# Supplementary material for: Gamification for health promotion: systematic review of behaviour change techniques in smartphone apps
Source: PubMed Central journal article supplement (PMC5073629; doi:10.1136/bmjopen-2016-012447), 2016-10-04
Supplement: bmjopen-2016-012447supp_prospero_file.pdf [file bmjopen-2016-012447supp_prospero_file.pdf]

## PROSPERO International prospective register of systematic reviews

---

### **‘Gamification’ for health behaviour change in smartphone apps: systematic review of behaviour change techniques**

*Elizabeth Edwards, Jim Lumsden, Carol Rivas, Liz Steed, Lindsey Edwards, Arun Rajan, Ratna Sohanpal, Hope Caton, Steph Taylor, Robert Walton*

---

#### **Citation**

Elizabeth Edwards, Jim Lumsden, Carol Rivas, Liz Steed, Lindsey Edwards, Arun Rajan, Ratna Sohanpal, Hope Caton, Steph Taylor, Robert Walton. ‘Gamification’ for health behaviour change in smartphone apps: systematic review of behaviour change techniques. PROSPERO 2015:CRD42015029841 Available from [http://www.crd.york.ac.uk/PROSPERO\\_REBRANDING/display\\_record.asp?ID=CRD42015029841](http://www.crd.york.ac.uk/PROSPERO_REBRANDING/display_record.asp?ID=CRD42015029841)

#### **Review question(s)**

What proportion of Health Care apps on the official Apple and Android stores use gamification to modify health behaviour?

What behaviour change techniques and combinations of techniques are used?

Is there an association between behaviour change techniques and combinations of techniques with NHS library ratings, user ratings and price?

#### **Searches**

We aim to identify all English language health apps using gamification and available on the official Apple and Android app stores that are ‘top rated’, defined by Apple and Google Play stores (<https://play.google.com/store>)(<https://itunes.apple.com>).

The following search terms will be used: rewards, prizes, avatar use, badges, leaderboards, competitions, health-related challenges. All apps meeting the inclusion criteria will be recorded in a standardized structured form.

#### **Types of study to be included**

Not applicable

#### **Condition or domain being studied**

We plan to review all apps that aim to modify any health behaviour.

#### **Participants/ population**

Inclusion criteria:

English language apps

Apps that use the following gamification techniques: rewards, prizes, avatar use, badges, leader boards, competitions, health-related challenges

Apps available through google play and I Tunes

Smart phone app

Apps in the Medical, Health & Wellness or Health & Fitness section

Apps targeted at users of any age

Free and paid apps

---

Exclusion criteria:

Apps designed for tablets

Non- English language apps

Non-health related apps

Apps that do not contain gamification techniques

Apps designed for Health Care professionals

### **Intervention(s), exposure(s)**

The identified apps will be screened independently by two review authors (EE, JL) trained in coding behaviour change techniques. Coding will be carried out independently by the two reviewers who will then cross-check for discrepancies. Responses from each review author will be recorded independently in a standardized structured form.

App content will be assessed against criteria derived from a behaviour change taxonomy used in health behaviour change intervention established by Michie et.al [1]. The taxonomy consists of 16 categories and 93 individual techniques. The number of individual techniques included in each app will be counted (range 0-93). The use of behaviour change categories, individual techniques and combinations of techniques will be examined. Associations with NHS library ratings, user ratings and price will also be explored.

References:

1. Michie, S., et al., The behavior change technique taxonomy (v1) of 93 hierarchically clustered techniques: building an international consensus for the reporting of behavior change interventions. *Ann Behav Med*, 2013. 46(1): p. 81-95.

### **Comparator(s)/ control**

Not applicable

### **Outcome(s)**

#### **Primary outcomes**

The number of Health Care apps to incorporate gamification:

We will assess the proportion of apps in the official Apple and Google Play stores and NHS health apps library to incorporate gamification in order to modify health behaviour. A systematic search of the top rated free and paid Medical, Health & Wellness, Health & Fitness apps will be conducted.

The use of behaviour change techniques and combination of Behaviour change technique:

The number of individual techniques included in each app will be counted (range 0-93). The mean number, median value and the range will also be calculated. We will investigate what behaviour change categories, individual techniques and combinations of techniques are used.

The association of behavior change technique use with downloads, user ratings, price and NHS library ratings:

We will explore associations between number of individual behaviour change technique and combination of behaviour change techniques with downloads, user ratings, price and NHS library ratings. Customer ratings will be obtained from the Apple store and Google Play. The total rating for all versions of the app will be used. The price will be recorded as free or paid. The exact price of each app will also be recorded.

As above, under each Primary outcome

#### **Secondary outcomes**

Not applicable

### **Data extraction, (selection and coding)**

The initial systematic review of top rated Medical, Health & Wellness, Health & Fitness apps on the official Apple and Google Play stores and NHS health apps library will be conducted by one review author (EE). Assessments against eligibility criteria will be recorded on a standardized structured form.

Medical, Health & Wellness or Health & Fitness apps meeting inclusion criteria will be downloaded on to a test device. The same test device will be used throughout the evaluation. Test devices will be unmodified consumer-grade smartphones running up-to-date versions of their mobile operating system. The same version of each app will be used throughout testing.

The identified apps will then be screened independently by two review authors (EE, JL) trained in BCT coding. Any discrepancies will be discussed with a third review author (LS). Responses from each review author will be recorded independently in a second standardized structured form.

Extracted information will include: version, date of first release, date of latest update, publisher, description of the app, main function of the app, target user, special features incorporated, number of downloads in the Android store, number in the chart in the Apple store. Missing data will be requested from the author/publisher or the app or Apple/Android store.

### **Risk of bias (quality) assessment**

Not Applicable

### **Strategy for data synthesis**

A quantitative synthesis of the number of apps to contain gamification will be conducted including all apps that meet the inclusion criteria and that are identified in the review. Basic descriptive statistics will be calculated. Apps found in both the Apple store and Google Play store will not be included twice and will be recorded only in the Apple iPhone data. The number of Behaviour change technique and combination of Behaviour change technique will be compared to user ratings, price and NHS library ratings. Apps that do not have customer ratings available will not be included in this analysis. Statistical significance of the association between the number of behaviour change techniques and the combination of behaviour change techniques with user ratings, price and NHS library ratings will be determined by linear regression or Spearman's Rank Correlation Coefficient as appropriate. This will be calculated using GraphPad Prism 6.

### **Analysis of subgroups or subsets**

None Planned

### **Dissemination plans**

The results of this research will be disseminated in a number of ways to all stakeholders. Professional groups both in the Academic/Clinical setting and Technologists will be informed through presentation at local, National and International conferences/meetings. Results of the review will be published in highly cited and open access peer reviewed journals. Relevant public health, NHS and other healthcare organisations including policy and decision makers will be informed of the results of the research. This will be at both local and national meetings.

### **Contact details for further information**

Dr Edwards

Barts and The London School of Medicine and Dentistry

Queen Mary University of London

Centre for Primary Care and Public Health, Blizard Institute

Yvonne Carter Building

58 Turner Street

London

E12AB

elizabethedwards@doctors.org.uk

**Organisational affiliation of the review**

Barts and The London School of Medicine and Dentistry, Queen Mary University of London, Centre for Primary Care and Public Health, Blizard Institute

<http://blizard.qmul.ac.uk/centres/centre-for-primary-care-and-public-health.html>

**Review team**

Dr Elizabeth Edwards, Centre for Primary Care and Public Health, Bart's and The London School of Medicine and Dentistry

Mr Jim Lumsden, School of Experimental Psychology University of Bristol

Dr Carol Rivas, Faculty of Health Sciences, University of Southampton

Dr Liz Steed, Centre for Primary Care and Public Health, Bart's and The London School of Medicine and Dentistry

Dr Lindsey Edwards, MRC Centre for transplantation, Kings College London

Dr Arun Rajan, Centre for Primary Care and Public Health, Bart's and The London School of Medicine and Dentistry

Dr Ratna Sohanpal, Centre for Primary Care and Public Health, Bart's and The London School of Medicine and Dentistry

Ms Hope Caton, Department of Computing and Information Systems, Kingston University

Professor Steph Taylor, Centre for Primary Care and Public Health, Bart's and The London School of Medicine and Dentistry

Professor Robert Walton, Centre for Primary Care and Public Health, Bart's and The London School of Medicine and Dentistry

**Anticipated or actual start date**

01 December 2014

**Anticipated completion date**

01 January 2016

**Funding sources/sponsors**

Supported by the NIHR Programme grant RP-PG-0609-10181

**Conflicts of interest**

None known

**Language**

English

**Country**

England

**Subject index terms status**

Subject indexing assigned by CRD

**Subject index terms**

Behavior Therapy; Health Behavior; Humans; Smartphone

**Stage of review**

Ongoing

**Date of registration in PROSPERO**

02 December 2015

**Date of publication of this revision**

02 December 2015

| <b>Stage of review at time of this submission</b>               | <b>Started</b> | <b>Completed</b> |
|-----------------------------------------------------------------|----------------|------------------|
| Preliminary searches                                            | No             | Yes              |
| Piloting of the study selection process                         | No             | Yes              |
| Formal screening of search results against eligibility criteria | No             | Yes              |
| Data extraction                                                 | No             | No               |
| Risk of bias (quality) assessment                               | No             | No               |
| Data analysis                                                   | No             | No               |

---

**PROSPERO**

**International prospective register of systematic reviews**

The information in this record has been provided by the named contact for this review. CRD has accepted this information in good faith and registered the review in PROSPERO. CRD bears no responsibility or liability for the content of this registration record, any associated files or external websites.

---
