# Supplementary material for: Gamification for health promotion: systematic review of behaviour change techniques in smartphone apps
Source: PubMed Central journal article supplement (PMC5073629; doi:10.1136/bmjopen-2016-012447), 2016-10-04
Supplement: bmjopen-2016-012447supp_table.pdf [file bmjopen-2016-012447supp_table.pdf]

**Supplementary Table 1: Characteristics of included apps**

| <b>Name of App</b>                                                       | <b>Category</b>   | <b>Source</b> | <b>Targeted behaviour</b>        | <b>Cost</b> | <b>User ratings</b> | <b>Number of BCTs</b> |
|--------------------------------------------------------------------------|-------------------|---------------|----------------------------------|-------------|---------------------|-----------------------|
| My Diet Coach – Pro                                                      | Health & Wellness | Android       | Weight loss                      | £1.99       | 4.5                 | 22                    |
| Nike+ Running                                                            | Health & Fitness  | Apple iPhone  | Exercise                         | £0.0        | 4                   | 18                    |
| Speedo Fit                                                               | Health & Fitness  | Apple iPhone  | Exercise                         | £0.0        | 3.5                 | 18                    |
| Runtastic Sit Ups Trainer PRO                                            | Health & Fitness  | Apple iPhone  | Exercise                         | £1.49       | 4.5                 | 18                    |
| Runtastic Squats Trainer                                                 | Health & Fitness  | Apple iPhone  | Exercise                         | £0.0        | 4.5                 | 18                    |
| Diabetes Companion by mySugr                                             | Medical           | Apple iPhone  | Blood sugar monitoring adherence | £0.0        | 5                   | 18                    |
| Runtastic Squats PRO                                                     | Health & Wellness | Android       | Exercise                         | £1.91       | 4.7                 | 18                    |
| Runtastic Pull-Ups PRO                                                   | Health & Wellness | Android       | Exercise                         | £1.73       | 4.5                 | 18                    |
| Runtastic Sit-Ups                                                        | Health & Wellness | Android       | Exercise                         | £0.0        | 4.4                 | 18                    |
| Runtastic Push-Ups                                                       | Health & Wellness | Android       | Exercise                         | £0.0        | 4.5                 | 18                    |
| Fitocracy                                                                | Health & Fitness  | Apple iPhone  | Fitness                          | £0.0        | 5                   | 17                    |
| UP                                                                       | Health & Fitness  | Apple iPhone  | Fitness                          | £0.0        | 2.5                 | 17                    |
| RunKeeper - GPS Track Run Walk                                           | Health & Wellness | Android       | Exercise                         | £0.0        | 4.4                 | 17                    |
| Run with Map My Run                                                      | Health & Fitness  | Apple iPhone  | Exercise                         | £0.0        | 5                   | 16                    |
| Map My Ride+ GPS Cycling Riding                                          | Health & Fitness  | Apple iPhone  | Exercise                         | £1.99       | 4.5                 | 16                    |
| Map My Ride - GPS Cycling, Riding, Mountain Biking, and Workout Tracking | Health & Fitness  | Apple iPhone  | Exercise                         | £0.0        | 4.5                 | 16                    |
| Map My Fitness                                                           | Health & Fitness  | Apple iPhone  | Fitness                          | £0.0        | 4.5                 | 16                    |
| Adrian James 6 Pack Abs Workout Lite                                     | Health & Fitness  | Apple iPhone  | Exercise                         | £0.0        | 5                   | 16                    |
| Run with Map My Run+                                                     | Health & Fitness  | Apple iPhone  | Exercise                         | £1.99       | 4.5                 | 16                    |
| Zombies, Run!                                                            | Health & Fitness  | Apple iPhone  | Exercise                         | £2.49       | 4.5                 | 16                    |
| Map My Walk+ GPS Pedometer                                               | Health & Wellness | Android       | Exercise                         | £1.91       | 4.4                 | 16                    |
| Map My Run+ GPS Running                                                  | Health & Wellness | Android       | Exercise                         | £1.99       | 4.5                 | 16                    |
| Map My Fitness+ Workout Trainer                                          | Health & Wellness | Android       | Exercise                         | £0.69       | 4.4                 | 16                    |

|                                                                          |                   |              |                   |       |     |    |
|--------------------------------------------------------------------------|-------------------|--------------|-------------------|-------|-----|----|
| Map My Hike+ GPS Hiking                                                  | Health & Wellness | Android      | Exercise          | £0.77 | 4.4 | 16 |
| Quit-Smoking Coach                                                       | Health & Wellness | Android      | Smoking Cessation | £2.90 | 4.4 | 16 |
| STOP Cigarettes PRO Quit Smoking                                         | Health & Wellness | Android      | Smoking Cessation | £1.86 | 4.8 | 16 |
| Map My Walk GPS Walking                                                  | Health & Wellness | Android      | Exercise          | £0.0  | 4.4 | 16 |
| Map My Run GPS Running                                                   | Health & Wellness | Android      | Exercise          | £0.0  | 4.5 | 16 |
| Endomondo Sports Tracker                                                 | Health & Fitness  | Apple iPhone | Exercise          | £0.0  | 3   | 15 |
| Nike+ FuelBand                                                           | Health & Fitness  | Apple iPhone | Exercise          | £0.0  | 4   | 15 |
| Strava Cycling                                                           | Health & Fitness  | Apple iPhone | Exercise          | £0.0  | 5   | 14 |
| 5K runner free                                                           | Health & Fitness  | Apple iPhone | Exercise          | £0.0  | 4.5 | 14 |
| Strava Run                                                               | Health & Fitness  | Apple iPhone | Exercise          | £0.0  | 5   | 14 |
| 5K Runner paid                                                           | Health & Fitness  | Apple iPhone | Exercise          | £1.99 | 5   | 14 |
| Zombies, Run! 5k Training Zombies                                        | Health & Fitness  | Apple iPhone | Exercise          | £1.49 | 4.5 | 14 |
| Freeletics                                                               | Health & Wellness | Android      | Fitness           | £1.99 | 4   | 14 |
| Fitbit                                                                   | Health & Fitness  | Apple iPhone | Fitness           | £0.0  | 4   | 13 |
| JEFIT Pro - Workout & Fitness                                            | Health & Wellness | Android      | Exercise          | £2.99 | 4.6 | 13 |
| Virtuagym Fitness Home & Gym                                             | Health & Wellness | Android      | Exercise          | £0.0  | 4.2 | 13 |
| 100% Army Fit                                                            | Health & Wellness | Android      | Fitness           | £0.0  | 4.4 | 13 |
| Karrimor Elite                                                           | Health & Wellness | Android      | Exercise          | £0.0  | 4.4 | 12 |
| 7 Minute Workout "Seven" with High Intensity Interval Training Challenge | Health & Fitness  | Apple iPhone | Exercise          | £0.0  | 4.5 | 11 |
| Change For Life- Smart Restart                                           | Health & Fitness  | Apple iPhone | Fitness           | £0.0  | 4.5 | 11 |
| Total Fitness - Gym & Workouts                                           | Health & Wellness | Android      | Exercise          | £0.0  | 4.4 | 11 |
| Aquafresh Brush Time                                                     | Health & Fitness  | Apple iPhone | Tooth brushing    | £0.0  | 3.5 | 10 |
| Adidas Snapshot                                                          | Health & Fitness  | Apple iPhone | Exercise          | £0.0  | 4.5 | 10 |
| Stop Smoking Pro                                                         | Health & Wellness | Android      | Smoking cessation | £1.99 | 4.3 | 10 |
| RunTroll                                                                 | Health & Wellness | Android      | Exercise          | £0.0  | 4.9 | 10 |
| Steps Mania Pro                                                          | Health & Wellness | Android      | Exercise          | £0.62 | 4.2 | 9  |

|                                |                   |              |                   |       |     |   |
|--------------------------------|-------------------|--------------|-------------------|-------|-----|---|
| Stop Smoking                   | Health & Wellness | Android      | Smoking cessation | £0.0  | 4.1 | 9 |
| MyFit Fitness                  | Health & Fitness  | Apple iPhone | Fitness           | £0.0  | 3.5 | 8 |
| The Spartan 300 Workout        | Health & Wellness | Android      | Exercise          | £3.10 | 4.3 | 8 |
| Disney Magic Timer by Oral-B   | Health & Wellness | Android      | Tooth brushing    | £0.0  | 3   | 7 |
| Runtastic Road Bike            | Health & Wellness | Android      | Exercise          | £0.0  | 4.6 | 7 |
| Plank Challenge                | Health & Wellness | Android      | Exercise          | £0.0  | 4   | 7 |
| Runmeter GPS Pedometer         | Health & Fitness  | Apple iPhone | Exercise          | £0.0  | 5   | 6 |
| Cyclemeter GPS                 | Health & Fitness  | Apple iPhone | Exercise          | £0.0  | 5   | 6 |
| Walkmeter GPS Pedometer        | Health & Fitness  | Apple iPhone | Exercise          | £0.0  | 4.5 | 6 |
| Gorilla Workout: Strength Plan | Health & Wellness | Android      | Exercise          | £0.62 | 4.3 | 6 |
| Fitness Flow                   | Health & Wellness | Android      | Fitness           | £2.75 | 4.5 | 6 |
| AllSport GPS PRO               | Health & Wellness | Android      | Exercise          | £3.10 | 4.1 | 6 |
| Fitness Flow FREE              | Health & Wellness | Android      | Adult Fitness     | £0.0  | 4   | 6 |
| Change4Life fun generator      | Health & Fitness  | Apple iPhone | Fitness           | £0.0  | 3   | 5 |
| Runtastic Pedometer            | Health & Wellness | Android      | Exercise          | £0.0  | 4.3 | 5 |

### **Supplementary Table 1: Characteristics of included apps**

Characteristics of apps meeting the inclusion criteria including: name of app, given category in the app store, source of app identified as either being from the Apple or Android store, targeted behaviour, cost of the app in sterling, user ratings as defined by either Apple or Android stores and number of individual behaviour change techniques included.
